# Supplementary material for: Novel antimonate photocatalysts MSb2O6 (M = Ca, Sr and Ba): a correlation between packing factor and photocatalytic activity
Source: Royal Society of Chemistry journal article supplement (doi:10.1039/b911352e), 2009-01-01
Supplement: b911352e.pdf [file b911352e.pdf]

## Supplementary Materials for

### **Novel Antimonate Photocatalysts MSb<sub>2</sub>O<sub>6</sub> (M = Ca, Sr and Ba): A Correlation between Packing Factor and Photocatalytic Activity**

Xinping Lin, Jianjun Wu, Xujie Lü, Zhichao Shan, Wendeng Wang and Fuqiang Huang\*

CAS Key Laboratory of Materials for Energy Conversion, Shanghai Institute of Ceramics,  
Chinese Academy of Sciences (SICCAS), Shanghai 200050, P. R. China (P.R.C).

#### **1. Literature on Photocatalytic Compounds**

A literature survey of the photocatalytic activity and structure factor is summarized in Table S1 and Table S3. Packing factor (PF) was computed using the crystallographic data of unit cell volumes and coordination numbers reported in the literature (i.e., the papers that reported photocatalysis or other papers/handbook/database on structures). The value of band gap ( $E_g$ ) was taken from the same report(s) on photocatalytic activity. Where applicable, additive used (RuO<sub>2</sub>, Pt or NiO) is specified.

#### **2. Additional materials**

Additional materials besides MSb<sub>2</sub>O<sub>6</sub> (M = Ca, Sr, Ba) for photocatalytic evaluation in our experiments were synthesized by solid state reaction or precipitation using high purity (Sinoreg., 99.5%) starting materials unless noted otherwise. (See descriptions on individual materials below.) The calcination temperature and time were chosen to yield comparable BET surface areas for powders of different

1 compounds in the same series. Phase identification was performed by X-ray powder  
2 diffraction (XRD) and only single phase powders were used. The optical band gaps  
3 were estimated from the UV-Vis diffuse reflection spectra.

4 (1)  $\text{TiO}_2$ : Commercial anatase  $\text{TiO}_2$  was heat-treated at 500 °C and 950 °C,  
5 respectively, to acquire anatase and rutile phases with similar surface area.

6 (2)  $\text{BiNbO}_4$ : Two polymorphs (orthorhombic and triclinic) were prepared by solid  
7 state reactions between  $\text{Bi}_2\text{O}_3$  and  $\text{Nb}_2\text{O}_5$  at 900 °C to 1100°C (orthorhombic) and  
8 1250°C (triclinic).

9 (3)  $M\text{TiO}_3$  ( $M = \text{Mg}, \text{Ca}, \text{Sr}$  and  $\text{Ba}$ ): These compounds were synthesized by  
10 precipitation of metal ( $M$ ) salt on  $\text{TiO}_2$  particles. A stoichiometric amount of  $\text{TiO}_2$   
11 (Degussa P25) was suspended in 200 mL of  $M(\text{NO}_3)_2$  aqueous solution with  $[\text{M}^{2+}] =$   
12 0.5 mol/L and 1 mL PEG (molecular weight: 200) was added. Next, 55 mL of  
13 aqueous solution of  $\text{Na}_2\text{CO}_3$  with  $[\text{CO}_3^{2-}] = 2$  mol/L was added dropwise into the  
14 suspension under vigorous stirring. The precipitates were repeatedly filtered and  
15 washed in water, then calcined at 850 °C to 1050 °C for 6 h.

16 (4)  $(\text{BaO})(\text{TiO}_2)_n$  ( $n = 1, 2$  and  $4$ ): These compounds were prepared by solid state  
17 reactions between  $\text{BaCO}_3$  and  $\text{TiO}_2$  at 1250°C for 12 h to 18 h.

18 (5)  $(\text{CaO})(\text{TiO}_2)_n$  ( $n = 1, 2$  and  $4$ ): These compounds were prepared by solid state  
19 reactions between  $\text{CaCO}_3$  and  $\text{TiO}_2$  at 1400°C for 12 h.

20 (6)  $M\text{Nb}_2\text{O}_6$  ( $M = \text{Mg}, \text{Ca}, \text{Sr}$  and  $\text{Ba}$ ): These compounds were synthesized by solid  
21 state reactions between  $M\text{CO}_3$  and  $\text{Nb}_2\text{O}_5$  at 1450°C for 12 h.

1 (7)  $MSb_2O_6$  ( $M = Ca, Sr$  and  $Ba$ ): These compounds were synthesized by solid state  
 2 reactions between  $M(NO_3)_2$  and  $Sb_2O_3$  at  $1150^\circ C$  for 24 h.

3 (8)  $MWO_4$  ( $M = Ca, Sr$  and  $Ba$ ): These compounds were synthesized by solid state  
 4 reactions between  $MCO_3$  and  $WO_3$  at  $850^\circ C$  to  $950^\circ C$ .

5 (9)  $MBiO_2Cl$  ( $M = Ca, Sr$  and  $Ba$ ): These compounds were prepared by solid state  
 6 reactions between  $BiOCl$  and  $MCO_3$  at  $780^\circ C$  for 12 h to 20 h.

7 (10)  $(SrO)_m(Bi_2O_3)_n$ : Compounds of  $Sr_2Bi_6O_{11}$ ,  $SrBi_4O_7$ ,  $SrBi_2O_4$ , and  $Sr_2Bi_2O_5$  were  
 8 prepared by solid state reactions between  $SrCO_3$  and  $Bi_2O_3$  at  $650^\circ C$  to  $780^\circ C$  for 12 h  
 9 to 28 h.

10

11 **Table S1 Photocatalytic compounds from the literature, grouped to illustrate the**  
 12 **perfect correlation between photocatalytic activity and packing factor (PF).**

| Catalyst                         | $E_g$ (eV) | Crystal system | Space group          | PF (%) | Measurement | Activity           | Ref.  |
|----------------------------------|------------|----------------|----------------------|--------|-------------|--------------------|-------|
| NaTaO <sub>3</sub>               | 3.96       | Orthorhombic   | -                    | 80.46  | UV, water   | Na > K             | S1    |
| KTaO <sub>3</sub>                | 3.42       | Cubic          | Pm3m                 | 85.03  | splitting   |                    |       |
| LiTaO <sub>3</sub>               | 4.7        | Rhombohedral   | R3c                  | 68.99  | UV, water   | Li > Na > K        | S2-S  |
| NaTaO <sub>3</sub>               | 4.0        | Orthorhombic   | -                    | 80.46  | splitting   |                    | 4     |
| KTaO <sub>3</sub>                | 3.6        | Cubic          | Pm-3m                | 85.03  |             |                    |       |
| CaTa <sub>2</sub> O <sub>6</sub> | 4.0        | Orthorhombic   | Pnma                 | 63.11  | UV, water   | Sr > Ba >          | S2,S5 |
| SrTa <sub>2</sub> O <sub>6</sub> | 4.4        | Orthorhombic   | Pbam                 | 62.13  | splitting   | Ca                 |       |
| BaTa <sub>2</sub> O <sub>6</sub> | 4.1        | Orthorhombic   | Pnma                 | 62.42  |             |                    |       |
| MgTa <sub>2</sub> O <sub>6</sub> | -          | Tetragonal     | P4 <sub>2</sub> /mnm | 65.35  | UV, water   | Ba > Mg            | S4    |
| BaTa <sub>2</sub> O <sub>6</sub> | -          | Orthorhombic   | Pnma                 | 62.42  | splitting   |                    |       |
| KTaO <sub>3</sub>                | 3.9        | Cubic          | Pm3m                 | 85.03  | UV, water   | K <sub>2</sub> > K | S6    |

|                                                         |      |              |                                               |       |                     |           |     |
|---------------------------------------------------------|------|--------------|-----------------------------------------------|-------|---------------------|-----------|-----|
| $K_2Ta_2O_6$                                            | 4.5  | Cubic        | Fd3m                                          | 67.87 | splitting           |           |     |
| Pt/CaTaO <sub>2</sub> N                                 | 2.5  | Orthorhombic | Pnma                                          | 76.71 | Vis, water          | Sr > Ca ≈ | S7  |
| Pt/SrTaO <sub>2</sub> N                                 | 2.1  | Cubic        | -                                             | 75.61 | splitting           | Ba        |     |
| Pt/BaTaO <sub>2</sub> N                                 | 2.0  | Cubic        | -                                             | 78.27 |                     |           |     |
| NaNbO <sub>3</sub>                                      | 3.08 | Orthorhombic | Pbma                                          | 78.60 | UV, water           | Na > K    | S1  |
| KNbO <sub>3</sub>                                       | 3.14 | Orthorhombic | Cm2m                                          | 83.38 | splitting           |           |     |
| Pt/NiNb <sub>2</sub> O <sub>6</sub>                     | 2.20 | Orthorhombic | Pbcn                                          | 66.49 | UV, water           | Ta > Nb   | S8  |
| Pt/NiTa <sub>2</sub> O <sub>6</sub>                     | 2.30 | Tetragonal   | P4 <sub>2</sub> /mnm                          | 65.45 | splitting           |           |     |
| Pt/AgNbO <sub>3</sub>                                   | 2.80 | Orthorhombic | -                                             | 67.42 | UV, O <sub>2</sub>  | Nb > Ta   | S9  |
| Pt/AgTaO <sub>3</sub>                                   | 3.40 | Monoclinic   | -                                             | 67.88 | evolution           |           |     |
| NiO/Sr <sub>2</sub> Nb <sub>2</sub> O <sub>7</sub>      | 3.90 | Orthorhombic | Cmcm                                          | 56.13 | UV, water           | Ta > Nb   | S10 |
| NiO/Sr <sub>2</sub> Ta <sub>2</sub> O <sub>7</sub>      | 4.60 | Orthorhombic | Cmcm                                          | 55.07 | splitting           |           |     |
| Pt/BiNbO <sub>4</sub>                                   | 2.64 | Orthorhombic | Pnna                                          | 57.60 | UV, water           | Nb > Ta   | S11 |
| Pt/BiTaO <sub>4</sub>                                   | 2.74 | Triclinic    | P1                                            | 58.93 | splitting           |           |     |
| Pt/InVO <sub>4</sub>                                    | 1.90 | Orthorhombic | Cmcm                                          | 53.57 | UV-Vis,             | V > Nb >  | S12 |
| Pt/InNbO <sub>4</sub>                                   | 2.50 | Monoclinic   | P2/c                                          | 63.36 | water               | Ta        |     |
| Pt/InTaO <sub>4</sub>                                   | 2.60 | Monoclinic   | P2/c                                          | 63.72 | splitting           |           |     |
| Pt/BaNi <sub>1/3</sub> Nb <sub>2/3</sub> O <sub>3</sub> | 3.82 | Cubic        | Pm-3m                                         | 74.09 | UV, water           | ZnNb >    | S13 |
| Pt/BaNi <sub>1/3</sub> Ta <sub>2/3</sub> O <sub>3</sub> | 4.50 | Hexagonal    | P-3m                                          | 74.20 | splitting           | ZnTa >    |     |
| Pt/BaNi <sub>1/3</sub> Nb <sub>2/3</sub> O <sub>3</sub> | 3.35 | Cubic        | Pm-3m                                         | 74.32 |                     | NiNb >    |     |
| Pt/BaNi <sub>1/3</sub> Ta <sub>2/3</sub> O <sub>3</sub> | 3.89 | Hexagonal    | P-3m                                          | 74.46 |                     | NiTa      |     |
| Zn <sub>3</sub> V <sub>2</sub> O <sub>8</sub>           | 2.92 | Tetragonal   | Abam                                          | 68.98 | Vis, O <sub>2</sub> | Zn > Mg > | S14 |
| Mg <sub>3</sub> V <sub>2</sub> O <sub>8</sub>           | 3.02 | Tetragonal   | Abam                                          | 69.56 | evolution           | Ni        |     |
| Ni <sub>3</sub> V <sub>2</sub> O <sub>8</sub>           | 2.25 | Tetragonal   | Abam                                          | 71.69 |                     |           |     |
| Mg <sub>2.5</sub> VMoO <sub>8</sub>                     | -    | Orthorhombic | Pnma                                          | 61.33 | Vis, O <sub>2</sub> | Zn > Mg   | S15 |
| Zn <sub>2.5</sub> VMoO <sub>8</sub>                     | -    | Orthorhombic | P2 <sub>1</sub> 2 <sub>1</sub> 2 <sub>1</sub> | 60.41 | evolution           |           |     |
| Ga <sub>2</sub> BiNbO <sub>7</sub>                      | 2.57 | Cubic        | Fd-3m                                         | 55.31 | UV, water           | Ga > In;  | S16 |
| In <sub>2</sub> BiNbO <sub>7</sub>                      | 2.52 | Cubic        | Fd-3m                                         | 56.69 | splitting;          |           |     |

|                                                                          |      |              |                      |       |                                      |                                   |     |
|--------------------------------------------------------------------------|------|--------------|----------------------|-------|--------------------------------------|-----------------------------------|-----|
|                                                                          |      |              |                      |       | Vis, MB<br>degradation               | Ga > In                           |     |
| Bi <sub>2</sub> YTaO <sub>7</sub>                                        | 2.23 | Cubic        | Fd-3m                | 54.37 | UV, water                            | La > Y;                           | S17 |
| Bi <sub>2</sub> LaTaO <sub>7</sub>                                       | 2.17 | Cubic        | Fd-3m                | 52.76 | splitting;<br>Vis, MB<br>degradation | La > Y                            |     |
| Sr(In <sub>1/2</sub> Nb <sub>1/2</sub> )O <sub>3</sub>                   | 3.62 | Cubic        | Pm3m                 | 72.83 | UV-Vis, MB                           | Sr > Ba                           | S18 |
| Ba(In <sub>1/2</sub> Nb <sub>1/2</sub> )O <sub>3</sub>                   | 3.30 | Cubic        | Pm3m                 | 75.24 | degradation                          |                                   |     |
| Sr(In <sub>1/3</sub> Nb <sub>1/3</sub> Sn <sub>1/3</sub> )O <sub>3</sub> | 3.48 | Cubic        | Pm3m                 | 72.84 | UV-Vis, MB                           | Sr > Ba                           | S18 |
| Ba(In <sub>1/3</sub> Nb <sub>1/3</sub> Sn <sub>1/3</sub> )O <sub>3</sub> | 3.00 | Cubic        | Pm3m                 | 75.49 | degradation                          |                                   |     |
| Ba(In <sub>1/3</sub> Pb <sub>1/3</sub> Nb <sub>1/3</sub> )O <sub>3</sub> | 1.48 | Cubic        | Pm3m                 | 75.51 | UV-Vis, MB                           | In > Ta                           | S19 |
| Ba(In <sub>1/3</sub> Pb <sub>1/3</sub> Ta <sub>1/3</sub> )O <sub>3</sub> | 1.50 | Cubic        | Pm3m                 | 76.71 | degradation                          |                                   |     |
| CaIn <sub>2</sub> O <sub>4</sub>                                         | -    | Orthorhombic | Pnam                 | 59.98 | Vis, MB                              | Ca > Sr >                         | S20 |
| SrIn <sub>2</sub> O <sub>4</sub>                                         | -    | Orthorhombic | Pnam                 | 61.36 | degradation                          | Ba                                |     |
| BaIn <sub>2</sub> O <sub>4</sub>                                         | -    | Monoclinic   | P2 <sub>1</sub> /a   | 62.90 |                                      |                                   |     |
| RuO <sub>2</sub> /CaIn <sub>2</sub> O <sub>4</sub>                       | -    | Orthorhombic | Pnam                 | 59.98 | UV-Vis,                              | Ca > Sr >                         | S21 |
| RuO <sub>2</sub> /SrIn <sub>2</sub> O <sub>4</sub>                       | -    | Orthorhombic | Pnam                 | 61.36 | water                                | Ba                                |     |
| RuO <sub>2</sub> /BaIn <sub>2</sub> O <sub>4</sub>                       | -    | Monoclinic   | P2 <sub>1</sub> /a   | 62.90 | splitting                            |                                   |     |
| RuO <sub>2</sub> /LiInO <sub>2</sub>                                     | -    | Tetragonal   | I4 <sub>1</sub> /amd | 64.39 | UV-Vis,                              | Na > Li                           | S22 |
| RuO <sub>2</sub> /NaInO <sub>2</sub>                                     | -    | Trigonal     | R-3m                 | 59.81 | water splitting                      |                                   |     |
| Pt/Anatase-TiO <sub>2</sub>                                              | 3.20 | Tetragonal   | -                    | 64.55 | UV, water                            | Anatase >                         | S23 |
| Pt/Rutile-TiO <sub>2</sub>                                               | 3.00 | Tetragonal   | -                    | 70.45 | splitting                            | Rutile                            |     |
| Li <sub>2</sub> TiO <sub>3</sub>                                         | -    | Monoclinic   | C2/c                 | 70.76 | UV, MB                               | Na > K > Li                       | S24 |
| Na <sub>2</sub> Ti <sub>3</sub> O <sub>7</sub>                           | -    | Monoclinic   | P2 <sub>1</sub> /m   | 63.05 | degradation                          |                                   |     |
| K <sub>2</sub> Ti <sub>8</sub> O <sub>17</sub>                           | -    | Monoclinic   | C2/m                 | 63.85 |                                      |                                   |     |
| RuO <sub>x</sub> /Na <sub>2</sub> Ti <sub>6</sub> O <sub>13</sub>        | 3.36 | Monoclinic   | C2/m                 | 61.65 | UV, water                            | Na > K >                          | S25 |
| RuO <sub>x</sub> /K <sub>2</sub> Ti <sub>6</sub> O <sub>13</sub>         | 3.26 | Monoclinic   | C2/m                 | 63.84 | splitting                            | Rb                                |     |
| RuO <sub>x</sub> /Rb <sub>2</sub> Ti <sub>6</sub> O <sub>13</sub>        | 3.13 | Monoclinic   | C2/m                 | 65.36 |                                      |                                   |     |
| RuO <sub>x</sub> /Na <sub>2</sub> Ti <sub>3</sub> O <sub>7</sub>         | 3.51 | Monoclinic   | P2 <sub>1</sub> /m   | 63.05 | UV, water                            | Ti <sub>6</sub> > Ti <sub>3</sub> | S25 |

|                                                       |      |              |                      |       |                     |                                  |     |
|-------------------------------------------------------|------|--------------|----------------------|-------|---------------------|----------------------------------|-----|
| $\text{RuO}_x/\text{Na}_2\text{Ti}_6\text{O}_{13}$    | 3.36 | Monoclinic   | C2/m                 | 61.65 | splitting           |                                  |     |
| $\text{RuO}_x/\text{K}_2\text{Ti}_2\text{O}_5$        | -    | Monoclinic   | -                    | 70.51 | UV, water           | $\text{Ti}_6 > \text{Ti}_4 >$    | S25 |
| $\text{RuO}_x/\text{K}_2\text{Ti}_4\text{O}_9$        | 3.46 | Monoclinic   | C2/m                 | 68.21 | splitting           | $\text{Ti}_2$                    |     |
| $\text{RuO}_x/\text{K}_2\text{Ti}_6\text{O}_{13}$     | 3.26 | Monoclinic   | C2/m                 | 63.84 |                     |                                  |     |
| $\text{RuO}_2/\text{BaTi}_4\text{O}_9$                | -    | Orthorhombic | Pnmm                 | 65.27 | UV, water           | $\text{Ti}_4 > \text{Ti}_{13} >$ | S26 |
| $\text{RuO}_2/\text{Ba}_4\text{Ti}_{13}\text{O}_{30}$ | -    | Orthorhombic | Abma                 | 66.43 | splitting           | $\text{Ti}_9 > \text{Ti}_{17}$   |     |
| $\text{RuO}_2/\text{Ba}_2\text{Ti}_9\text{O}_{20}$    | -    | Monoclinic   | P2 <sub>1</sub> /m   | 68.10 |                     |                                  |     |
| $\text{RuO}_2/\text{Ba}_6\text{Ti}_{17}\text{O}_{40}$ | -    | Monoclinic   | A2/a                 | 68.93 |                     |                                  |     |
| $\text{RuO}_2/\text{BaTi}_4\text{O}_9$                | -    | Orthorhombic | Pnmm                 | 65.27 | UV, water           | $\text{Ba} > \text{K}$           | S27 |
| $\text{RuO}_2/\text{K}_2\text{Ti}_4\text{O}_9$        | -    | Monoclinic   | C2/m                 | 68.21 | splitting           |                                  |     |
| $\text{NiO}_x/\text{La}_2\text{Ti}_2\text{O}_7$       | 3.82 | Monoclinic   | P2 <sub>1</sub>      | 63.66 | UV, water           | $\text{La} > \text{Pr} >$        | S28 |
| $\text{NiO}_x/\text{Pr}_2\text{Ti}_2\text{O}_7$       | 2.99 | Monoclinic   | P2 <sub>1</sub>      | 64.48 | splitting           | $\text{Nd}$                      |     |
| $\text{NiO}_x/\text{Nd}_2\text{Ti}_2\text{O}_7$       | 3.65 | Monoclinic   | P2 <sub>1</sub>      | 64.56 |                     |                                  |     |
| $\text{RuO}_2/\text{Ca}_2\text{Sb}_2\text{O}_7$       | -    | Orthorhombic | Imma                 | 65.41 | UV, water           | $\text{Sr} > \text{Ca}$          | S29 |
| $\text{RuO}_2/\text{Sr}_2\text{Sb}_2\text{O}_7$       | -    | Orthorhombic | Imma                 | 64.45 | splitting           |                                  |     |
| $\text{Ca}_2\text{Sb}_2\text{O}_7$                    | 4.02 | Orthorhombic | Imma                 | 65.41 | UV, MO              | $\text{Sr} > \text{Ca}$          | S30 |
| $\text{Sr}_2\text{Sb}_2\text{O}_7$                    | 3.86 | Orthorhombic | Imma                 | 64.45 | degradation         |                                  |     |
| $\text{RuO}_2/\text{Ca}_2\text{SnO}_4$                | -    | Orthorhombic | Pbam                 | 63.01 | UV, water           | $\text{Ca} > \text{Sr} >$        | S29 |
| $\text{RuO}_2/\text{Sr}_2\text{SnO}_4$                | -    | Tetragonal   | I4/mmm               | 63.79 | splitting           | $\text{Ba}$                      |     |
| $\text{RuO}_2/\text{Ba}_2\text{SnO}_4$                | -    | Tetragonal   | I4/mmm               | 64.62 |                     |                                  |     |
| $\text{Pt}/\text{SrCrO}_4$                            | 2.44 | Monoclinic   | P2 <sub>1</sub> /n   | 61.18 | Vis or UV,          | $\text{Ba} > \text{Sr}$          | S31 |
| $\text{Pt}/\text{BaCrO}_4$                            | 2.63 | Orthorhombic | Pnma                 | 59.19 | water splitting     |                                  |     |
| $\text{Pt}/\text{CuMn}_2\text{O}_4$                   | 1.40 | Tetragonal   | I4 <sub>1</sub> /amd | 65.07 | Halogen lamp,       | $\text{Zn} > \text{Cu}$          | S32 |
| $\text{Pt}/\text{ZnMn}_2\text{O}_4$                   | 1.23 | Tetragonal   | I4 <sub>1</sub> /amd | 62.15 | water splitting     |                                  |     |
| $\text{Bi}_2\text{MoO}_6$                             | 2.70 | Orthorhombic | -                    | 58.19 | Vis, O <sub>2</sub> | $\text{Mo} > \text{W}$           | S33 |
| $\text{Bi}_2\text{WO}_6$                              | 2.80 | Orthorhombic | -                    | 58.69 | evolution           |                                  |     |
| $\text{ZnS}$                                          | 3.70 | -            | -                    | 67.88 | UV, MO and          | $\text{Cd} > \text{Zn}$          | S34 |
| $\text{CdS}$                                          | 2.50 | -            | -                    | 56.99 | Rhodamine<br>6G     |                                  |     |

|                       |      |          |      |       |             |           |     |
|-----------------------|------|----------|------|-------|-------------|-----------|-----|
|                       |      |          |      |       | degradation |           |     |
| ZnS                   | -    | -        | -    | 67.88 | UV, water   | Cd > Zn   | S35 |
| CdS                   | -    | -        | -    | 56.99 | splitting   |           |     |
| Pt/CdS                | 2.40 | -        | -    | 56.99 | Vis, water  | Cd > NaIn | S36 |
| Pt/NaInS <sub>2</sub> | 2.30 | Trigonal | R-3m | 70.74 | splitting   |           |     |

1

2 Table S2 Photocatalytic compounds from the literature, grouped to illustrate  
3 exceptions to the correlation between photocatalytic activity and packing factor (PF).

4 The exceptions are marked by \* under “Activity” and explained in note a to f.

| Catalyst                                                                 | $E_g$ (eV) | Crystal system | Space group        | PF (%) | Measurement                   | Activity                                         | Ref. |
|--------------------------------------------------------------------------|------------|----------------|--------------------|--------|-------------------------------|--------------------------------------------------|------|
| Pt/Bi <sub>2</sub> InTaO <sub>7</sub>                                    | 2.92       | Cubic          | -                  | 53.13  | UV, water                     | In > Fe                                          | S37  |
| Pt/Bi <sub>2</sub> FeTaO <sub>7</sub>                                    | 2.42       | Cubic          | -                  | 57.04  | splitting                     | >* <sup>a</sup> Ga                               |      |
| Pt/Bi <sub>2</sub> GaTaO <sub>7</sub>                                    | 3.01       | Cubic          | -                  | 56.12  |                               |                                                  |      |
| Pt/CaCo <sub>1/3</sub> Nb <sub>2/3</sub> O <sub>3</sub>                  | 2.80       | Monoclinic     | -                  | 76.70  | Vis ( $\lambda \geq 420$      | Ba >* <sup>b</sup> Ca                            | S38  |
| Pt/SrCo <sub>1/3</sub> Nb <sub>2/3</sub> O <sub>3</sub>                  | 2.46       | Cubic          | Pm3m               | 79.21  | nm), water                    | > Sr                                             |      |
| Pt/BaCo <sub>1/3</sub> Nb <sub>2/3</sub> O <sub>3</sub>                  | 2.46       | Cubic          | Pm3m               | 77.54  | splitting                     |                                                  |      |
| CaIn <sub>0.5</sub> Nb <sub>0.5</sub> O <sub>3</sub>                     | 4.17       | Orthorhombic   | Pama               | 68.71  | Pt loading, UV,               | Ca > Sr >                                        | S39  |
| SrIn <sub>0.5</sub> Nb <sub>0.5</sub> O <sub>3</sub>                     | 3.96       | Cubic          | Pm3m               | 72.83  | water splitting;              | Ba;                                              |      |
| BaIn <sub>0.5</sub> Nb <sub>0.5</sub> O <sub>3</sub>                     | 3.51       | Cubic          | Pm3m               | 75.24  | NiO <sub>x</sub> loading, Vis | Ba >* <sup>c</sup> Ca >                          |      |
|                                                                          |            |                |                    |        | ( $\lambda \geq 420$ nm),     | Sr                                               |      |
|                                                                          |            |                |                    |        | water splitting               |                                                  |      |
| RuO <sub>2</sub> /BaTi <sub>4</sub> O <sub>9</sub>                       | 3.70       | Orthorhombic   | Pnmm               | 65.27  | UV, water                     | BaTi <sub>4</sub> O <sub>9</sub> >               | S40  |
| RuO <sub>2</sub> /BaTi <sub>5</sub> O <sub>11</sub>                      | 3.80       | Monoclinic     | P2 <sub>1</sub> /n | 68.96  | splitting                     | BaTi <sub>2</sub> O <sub>5</sub> >* <sup>d</sup> |      |
| RuO <sub>2</sub> /BaTi <sub>2</sub> O <sub>5</sub>                       | 3.70       | Monoclinic     | C2/m               | 70.97  |                               | BaTi <sub>5</sub> O <sub>11</sub> >              |      |
| RuO <sub>2</sub> /BaTiO <sub>3</sub>                                     | 3.70       | Cubic          | Pm-3m              | 82.24  |                               | BaTiO <sub>3</sub>                               |      |
| Sr(In <sub>1/3</sub> Nb <sub>1/3</sub> Pb <sub>1/3</sub> )O <sub>3</sub> | 3.10       | Cubic          | Pm3m               | 75.21  | UV-Vis or Vis, MB             | Ba >* <sup>e</sup> Sr                            | S18  |
| Ba(In <sub>1/3</sub> Nb <sub>1/3</sub> Pb <sub>1/3</sub> )O <sub>3</sub> | 1.48       | Cubic          | Pm3m               | 75.51  | and 4-Chlorophenol            |                                                  |      |
|                                                                          |            |                |                    |        | degradation                   |                                                  |      |

|                    |      |              |      |       |           |                       |    |
|--------------------|------|--------------|------|-------|-----------|-----------------------|----|
| NaTaO <sub>3</sub> | 3.96 | Orthorhombic | -    | 80.46 | UV, water | Ta > <sup>*f</sup> Nb | S1 |
| NaNbO <sub>3</sub> | 3.08 | Orthorhombic | Pbma | 78.60 | splitting |                       |    |
| KTaO <sub>3</sub>  | 3.42 | Cubic        | Pm3m | 85.03 | UV, water | Ta > <sup>*f</sup> Nb | S1 |
| KNbO <sub>3</sub>  | 3.14 | Orthorhombic | Cm2m | 83.38 | splitting |                       |    |

- 1 a. Fe absorbs more light due to  $d^5$  configuration of Fe<sup>3+</sup>.
- 2 b. Ca compound, having a higher  $E_g$ , absorbs less light when using a visible light
- 3 source.
- 4 c. All compounds have relatively high  $E_g$ , hence inefficient light absorption
- 5 when using a visible light source.
- 6 d. Crystallinity of BaTi<sub>5</sub>O<sub>11</sub> was reported to be poor.
- 7 e. Large difference in  $E_g$  makes comparison difficult; Ba compound has a much
- 8 lower  $E_g$  and more absorption.
- 9 f. The considerably larger  $E_g$  of the Ta compounds implies a higher conduction
- 10 band minimum, hence a higher reduction potential for H<sup>+</sup>/H<sub>2</sub>.

### 11 3. The UV-Vis spectra for the antimonates

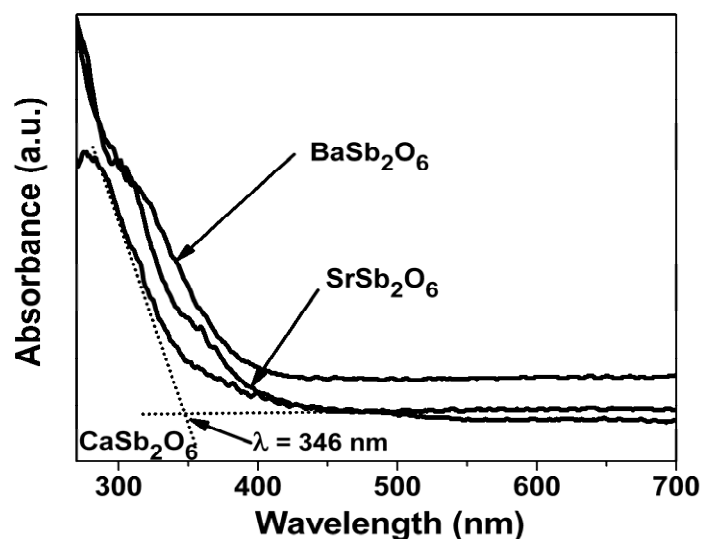

13 Fig. S1 UV-Vis for the antimonates photocatalysts\*

14 \* As shown in Fig. S1, the light absorbance starts at about 350 nm for all the  
 15 antimonate samples, while a uniform red shift of absorbance edge is observed in the  
 16 order of CaSb<sub>2</sub>O<sub>6</sub> ( $\lambda = 346$  nm), SrSb<sub>2</sub>O<sub>6</sub> ( $\lambda = 349$  nm), and BaSb<sub>2</sub>O<sub>6</sub> ( $\lambda = 358$  nm). So  
 17



1 the intrinsic band gaps of  $\text{CaSb}_2\text{O}_6$ ,  $\text{SrSb}_2\text{O}_6$  and  $\text{BaSb}_2\text{O}_6$  are estimated at 3.59 eV,  
2 3.55 eV and 3.46 eV, respectively, using the widely-applied equation:

3 
$$E_g \text{ (eV)} = 1241 / \lambda \text{ (nm)}.$$

4 **4. The MB mineralization measurements**

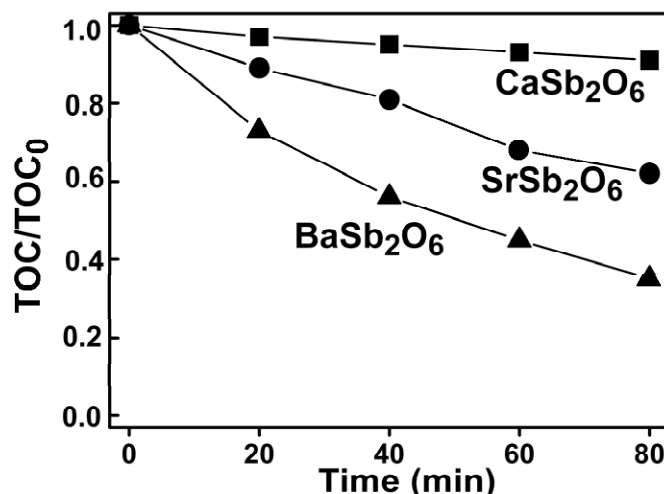

5

6 Fig. S2 MB mineralization over antimonate photocatalysts under UV-irradiation (Cat:  
7 0.6 g, MB: 4.5 mg, H<sub>2</sub>O: 300 mL)\*

8 \* The MB mineralization results show that  $\text{BaSb}_2\text{O}_6$  is most active while  $\text{CaSb}_2\text{O}_6$  is  
9 least. The dye mineralization degrees after the reaction time of 80 min, are about 65%  
10 for  $\text{BaSb}_2\text{O}_6$ , 38% for  $\text{SrSb}_2\text{O}_6$ , and 9% for  $\text{CaSb}_2\text{O}_6$ , respectively.

11

12 **References:**

13 S1 J. W. Liu, G. Chen, Z. H. Li and Z. G. Zhang, *Int. J. Hydrog. Energ.*, 2007, **32**,  
14 2269.

15 S2 A. Kudo, *Int. J. Hydrog. Energ.*, 2006, **31**, 197.

16 S3 H. Kato and A. Kudo, *J. Phys. Chem. B*, 2001, **105**, 4285.

17 S4 H. Kato and A. Kudo, *Chem. Phys. Lett.*, 1998, **295**, 487.

18 S5 H. Kato and A. Kudo, *Chem. Lett.*, 1999, 1207.

19 S6 T. Ishihara, N. S. Baik, N. Ono, H. Nishiguchi and Y. Takita, *J. Photochem.*

20 *Photobiol. A*, 2004, **167**, 149.

- 1 S7 D. Yamasita, T. Takata, M. Hara, J. N. Kondo and K. Domen, *Solid State Ionics*,  
2 2004, **172**, 591.
- 3 S8 J. Ye, Z. Zou and A. Matsushita, *Int. J. Hydrog. Energ.*, 2003, **28**, 651.
- 4 S9 H. Kato, H. Kobayashi and A. Kudo, *J. Phys. Chem. B*, 2002, **106**, 12441.
- 5 S10 A. Kudo, H. Kato and S. Nakagawa, *J. Phys. Chem. B*, 2000, **104**, 571.
- 6 S11 Z. Zou and H. Arakawa, *J. Photochem. Photobiol. A*, 2003, **158**, 145.
- 7 S12 J. Ye, Z. Zou, H. Arakawa, M. Oshikiri, M. Shimoda, A. Matsushita and T.  
8 Shishido, *J. Photochem. Photobiol. A*, 2002, **148**, 79.
- 9 S13 J. Yin, Z. Zou and J. Ye, *J. Phys. Chem. B*, 2004, **108**, 8888.
- 10 S14 D. Wang, J. Tang, Z. Zou and J. Ye, *Chem. Mater.*, 2005, **17**, 5177.
- 11 S15 D. Wang, Z. Zou and J. Ye, *Catal. Today*, 2004, **93–95**, 891.
- 12 S16 J. Luan, S. Zheng, X. Hao, G. Luan, X. Wu and Z. Zou, *J. Braz. Chem. Soc.*,  
13 2006, **17**, 1368.
- 14 S17 J. F. Luan, X. P. Hao, S. R. Zheng, G. Y. Luan and X. S. Wu, *J. Mater. Sci.*, 2006,  
15 **41**, 8001.
- 16 S18 S. G. Hur, T. W. Kim, S. J. Hwang and J. H. Choy, *J. Photochem. Photobiol. A*,  
17 2006, **183**, 176.
- 18 S19 S. G. Hur, T. W. Kim, S. J. Hwang, H. Park, W. Choi, S. J. Kim and J. H. Choy,  
19 *J. Phys. Chem. B*, 2005, **109**, 15001.
- 20 S20 J. Sato, N. Saito, H. Nishiyama and Y. Inoue, *J. Phys. Chem. B*, 2001, **105**, 6061.
- 21 S21 J. Tang, Z. Zou and J. Ye, *Chem. Mater.*, 2004, **16**, 1644.

- 1 S22 J. Sato, H. Kobayashi, N. Saito, H. Nishiyama and Y. Inoue, *J. Photochem.*  
2 *Photobiol. A*, 2003, **158**, 139.
- 3 S23 R. Abe, K. Sayama, K. Domen and H. Arakawa, *Chem. Phys. Lett.*, 2001, **344**,  
4 339.
- 5 S24 H. Song, H. Jiang, T. Liu, X. Liu and G. Meng, *Mater. Res. Bull.*, 2007, **42**, 334.
- 6 S25 Y. Inoue, T. Kubokawa and K. Sato, *J. Phys. Chem.*, 1991, **95**, 4059.
- 7 S26 M. Kohno, K. Sato and Y. Inoue, *J. Chem. Soc. Faraday Trans.*, 1998, **94**, 89.
- 8 S27 S. Ogura, K. Sato and Y. Inoue, *Phys. Chem. Chem. Phys.*, 2000, **2**, 2449.
- 9 S28 D. W. Hwang, J. S. Lee and S. H. Oh, *J. Phys. Chem. B*, 2003, **107**, 4963.
- 10 S29 J. Sato, N. Saito and Y. Inoue, *J. Photochem. Photobiol. A*, 2002, **148**, 85.
- 11 S30 X. Lin, F. Huang, W. Wang, Y. Wang and J. Shi, *Appl. Catal. A*, 2006, **313**, 218.
- 12 S31 J. Yin, Z. Zou and J. Ye, *Chem. Phys. Lett.*, 2003, **378**, 24.
- 13 S32 Y. Bessekhoud and M. Trari, *Int. J. Hydrog. Energ.*, 2002, **27**, 357.
- 14 S33 A. Kudo and S. Hijii, *Chem. Lett.*, 1999, 1103.
- 15 S34 S. K. Kansal, M. Singh and D. Sud, *J. Hazard. Mater.* 2007, **141**, 581.
- 16 S35 A. M. Roy and G. C. De, *J. Photochem. Photobiol. A*, 2003, **157**, 87.
- 17 S36 A. Kudo, *Int. J. Hydrog. Energ.*, 2007, **32**, 2673.
- 18 S37 J. Wang, Z. Zou and J. Ye, *J. Phys. Chem. Solids*, 2005, **66**, 349.
- 19 S38 J. Yin, Z. Zou and J. Ye, *J. Phys. Chem. B*, 2003, **107**, 4936.
- 20 S39 J. Yin, Z. Zou and J. Ye, *J. Phys. Chem. B*, 2003, **107**, 61.
- 21 S40 Y. Yamashita, M. Tada, M. Kakihana, M. Osada and K. Yoshida, *J. Mater.*  
22 *Chem.*, 2002, **12**, 1782.
